1 **SpyDisplay: A Versatile Phage Display Selection System using SpyTag/SpyCatcher Technology**

2 Sarah-Jane Kellmann<sup>1,\*</sup>, Christian Hentrich<sup>1,\*</sup>, Mateusz Putyrski<sup>1,\*</sup>, Hanh Hanuschka<sup>1</sup>, Manuel Cavada<sup>1</sup>,  
3 Achim Knappik<sup>1</sup>, Francisco Ylera<sup>1,+</sup>

4 <sup>1</sup> Bio-Rad AbD Serotec GmbH, Anna-Sigmund-Str. 5, 82061 Neuried, Germany

5 \* These authors contributed equally

6 + Correspondence should be addressed to [francisco\\_ylera@bio-rad.com](mailto:francisco_ylera@bio-rad.com) (Lead Contact)

7

8

9 **Abstract**

10 Phage display is an established method for the *in vitro* selection of recombinant antibodies and other  
11 proteins or peptides from gene libraries. Here we describe SpyDisplay, a phage display method in which  
12 the display is achieved via SpyTag/SpyCatcher protein ligation instead of genetically fusing the displayed  
13 protein to a phage coat protein. In our implementation, SpyTagged Fab antibody fragments are  
14 displayed via protein ligation on filamentous phages carrying SpyCatcher fused to the pIII coat protein. A  
15 library of genes encoding Fab antibodies was cloned in an expression vector containing f1 replication  
16 origin, and SpyCatcher-pIII was separately expressed from a genomic locus in engineered *E. coli*. We  
17 demonstrate the functional, covalent display of Fab on phage, and rapidly isolate specific high-affinity  
18 clones via phage panning, confirming the robustness of this selection system. SpyTagged Fabs – the  
19 direct outcome of the panning campaign - are compatible with modular antibody assembly using  
20 prefabricated SpyCatcher modules and can be directly tested in diverse assays. Furthermore, SpyDisplay  
21 streamlines additional applications that have traditionally been challenging for phage display: we show  
22 that it can be applied to N-terminal display of the protein of interest and it also enables display of  
23 cytoplasmically folding proteins exported to periplasm via the TAT pathway.

24 **Keywords**

25 SpyTag/SpyCatcher; antibody phage display; SpyDisplay; Fab antibody library

26

1 **Abbreviations**

2 CDR: complementarity determining region; cfu: colony-forming unit; Fab: antigen binding fragment of  
3 an antibody; FRT: flippase recognition target; HRP: horseradish peroxidase; IgG: immunoglobulin G;  
4 IPTG: isopropyl  $\beta$ -D-1-thiogalactopyranoside;  $\kappa$ : kappa light chain of an antibody;  $\lambda$ : lambda light chain of  
5 an antibody; MBP: maltose-binding protein; mGFP: monomeric green fluorescent protein; pIII:  
6 filamentous phage protein III; TAT: twin arginine translocase; TEV: tobacco etch virus; ELISA: enzyme-  
7 linked immunosorbent assay; BLI: biolayer interferometry; PBS: phosphate-buffered saline; TBS: tris-  
8 buffered saline; BSA: bovine serum albumin; PEG: polyethylene glycol; scFv: single-chain variable  
9 fragment; SD: standard deviation

## 1 **Introduction**

2 The *in vitro* selection of peptides and proteins with desired properties from large gene libraries (Jijakli et  
3 al., 2016) is a powerful approach that has been used extensively for the discovery of binding molecules  
4 (Jijakli et al., 2016), including antibodies (Winter et al., 1994). All *in vitro* selection technologies require  
5 the physical linkage of genotype and phenotype. Phage display is the oldest and most widely used method  
6 due to its robustness and favorable properties such as speed, simplicity, and accommodation of large  
7 libraries. To couple genotype to phenotype, the proteins to be selected are displayed on the surface of  
8 engineered filamentous M13 phages, which in addition contain the genetic information of the presented  
9 proteins. In conventional phage display, the displayed protein is genetically fused to a coat protein of the  
10 phage, in most cases to the minor coat protein pIII. Instead of a full phage genome, smaller plasmid  
11 derivatives called phagemids are commonly used in phage display, as they simplify cloning and allow the  
12 creation of larger libraries (Breitling et al., 1991; Qi et al., 2012). Such phagemids contain the genes for  
13 the displayed proteins fused to the gene encoding the phage coat protein used for display, antibiotic  
14 resistance genes, and genetic elements required for plasmid-like replication as well as for replication of  
15 ssDNA and its packaging in phage capsid. Phage display with phagemids necessitates the use of helper  
16 phage, which provides the remaining structural and regulatory phage proteins that are not present in the  
17 phagemid and thus allows phage assembly after superinfection of phagemid-containing bacteria. After  
18 several rounds of phage display, the selected genes are typically subcloned into a suitable expression  
19 plasmid (Dubel et al., 1993) for screening and further analysis.

20 The SpyTag/SpyCatcher protein ligation technology (Zakeri et al., 2012) is a versatile method to covalently  
21 link two proteins. The SpyTag, a short peptide of 13 amino acids, reacts spontaneously with SpyCatcher  
22 protein (12.3 kDa) to form an isopeptide bond between an aspartic acid residue in the tag and a lysine  
23 residue in the Catcher, crosslinking the two (Fig. 1A: SpyTag/SpyCatcher system). The reaction is fast,  
24 specific and has been further optimized in form of the SpyTag2/SpyCatcher2 (Keeble et al., 2017) and  
25 SpyTag3/SpyCatcher3 (Keeble et al., 2019) systems. This technology has been used in many different  
26 applications, for example in the production of vaccine nanoparticles or stabilized enzymes (Keeble and  
27 Howarth, 2020). Furthermore, it has recently been applied for modular antibody assembly and site-  
28 specific labeling of antibodies (Alam et al., 2017; Hentrich et al., 2021).

29 In this work, we establish a phage display method based on SpyTag/SpyCatcher technology that we refer  
30 to as SpyDisplay. We show that SpyTagged Fab fragments expressed in *E. coli* react *in vivo* with  
31 coexpressed SpyCatcher-pIII, resulting in Fab-SpyCatcher-pIII fusion proteins that are incorporated into

1 phage particles, thus enabling phage display (Fig. 1B). In SpyDisplay, the library and display system are  
2 separated by using a phagemid-based expression vector which encodes the SpyTagged Fab, and a  
3 separate genomically integrated and inducible gene encoding SpyCatcher-pIII. This design avoids any  
4 subcloning steps for the expression of free Fab and allows the use of smaller phagemids without the pIII  
5 gene. We demonstrate the selection of high-affinity Fab fragments from an antibody library using  
6 SpyDisplay. Furthermore, we show that SpyDisplay is a straightforward way for N-terminal phage display  
7 (where the protein of interest is displayed with a free C-terminus) and is also compatible with the display  
8 of cytoplasmic folding proteins, exported to bacterial periplasm via the twin arginine translocase (TAT)  
9 pathway.

## 1 Results

### 2 Generation of a SpyCatcher-pIII expressing *E. coli* strain and production of SpyCatcher-displaying phages

3 To present antibodies on the phage surface via SpyDisplay, SpyCatcher needs to be fused to M13 minor  
4 coat protein pIII. We decided to use the improved version SpyCatcher2/SpyTag2 (Keeble et al., 2017),  
5 from now on referred to as SpyCatcher/SpyTag. A TEV protease cleavage site was placed between  
6 SpyCatcher and pIII to allow mild and affinity-independent elution of bound phages by proteolytic  
7 cleavage (Ward et al., 1996). The SpyCatcher-TEV-pIII expression cassette was integrated into the *E. coli*  
8 genome to avoid using an additional plasmid. The SpyCatcher-pIII gene under control of the arabinose  
9 promoter was integrated at the *araBAD* locus of TG1 *E. coli* (Fig. 2A), replacing the endogenous *araBAD*  
10 genes required for arabinose metabolism (Guzman et al., 1995). In this new bacterial strain, termed SK25,  
11 arabinose could be used to induce the expression of SpyCatcher-pIII, as assessed by western blotting (Fig.  
12 2B)

13 To test the incorporation of SpyCatcher-pIII into the phage capsid, we produced SpyCatcher phages by  
14 infecting SK25 cells with Hyperphage (Rondot et al., 2001), a helper phage lacking pIII. Western blotting  
15 of these phages with anti-pIII antibody yielded a single, strong band for SpyCatcher-pIII, which migrated  
16 at a slightly higher molecular weight than calculated. (Fig. 2C).

17

### 18 Production of Fab-phages in *E. coli* SK25

19 To establish antibody phage display via SpyTag/SpyCatcher, Fab fragments of the therapeutic antibodies  
20 adalimumab and trastuzumab were cloned into the expression vector pBBx2-F-Spy2-H (Hentrich et al.,  
21 2021), which contains an f1 phage replication origin and can therefore be employed as a phagemid. In this  
22 phagemid, Fab expression is under control of the *lac* promoter and the heavy chain of the Fab is C-  
23 terminally fused to three consecutive peptide tags: FLAG-tag, SpyTag2, and His<sub>6</sub>-tag. The phagemids were  
24 transformed into *E. coli* SK25 cells and the cells were subsequently infected with VCSM13 helper phage.  
25 Monovalent Fab-phages displaying not more than one Fab antibody fragment per phage particle were  
26 produced using arabinose to induce expression of SpyCatcher-pIII and IPTG to induce expression of Fab.  
27 In parallel, polyvalent Fab-phages were produced using Hyperphage and analogous induction of  
28 expression with arabinose and IPTG. Phages were purified and concentrated by polyethylene glycol (PEG)  
29 precipitation from the supernatants of overnight cultures. Initially, phage titers of mono- and polyvalent

1 Fab-phages measured by spot titration differed by three orders of magnitude and were  $3.1 \times 10^{13}$  cfu/mL  
2 (SD= $0.5 \times 10^{13}$  cfu/mL) for monovalent Fab-phages and  $6.5 \times 10^9$  cfu/mL (SD= $1.9 \times 10^9$  cfu/mL) for the  
3 polyvalent ones. It has been described that fusions to the N-terminus of pIII decrease phage infectivity  
4 (Loiset et al., 2008) and we suspected this to be the explanation for the apparent low titer of the polyvalent  
5 Fab-phages. Therefore, to allow better comparison of titers, Fab-phage particles were digested with TEV  
6 protease prior to spot titration, cleaving the Fab-SpyCatcher fusion off the pIII protein. After treatment  
7 with TEV protease, the titer of the monovalent phages was unchanged  $2.8 \times 10^{13}$  cfu/mL (SD= $0.8 \times 10^{13}$   
8 cfu/mL) while the polyvalent titer was 100-fold higher ( $7.2 \times 10^{11}$  cfu/mL; SD= $1.5 \times 10^{11}$  cfu/mL) than  
9 before protease treatment. The remaining difference of two orders of magnitude between regular helper  
10 phage and Hyperphage titer has been observed before (Loiset et al., 2008) and is likely caused by steric  
11 hindrance of the modified pIII proteins during phage assembly. Western blots of monovalent and  
12 polyvalent SpyDisplay Fab-phages confirmed that Fab-SpyCatcher-pIII fusions were successfully inserted  
13 into the phage particles (Fig 3A). As wildtype pIII is incorporated faster into the phage coat than modified  
14 pIII, monovalent phages had a much lower ratio of Fab-pIII to wildtype pIII (about 4%, estimated by  
15 densitometry) than the polyvalent phages (Fig 3A). Since an estimated 4% of all pIII proteins carry a Fab  
16 and there are 5 copies of pIII per phage particle, approximately 20% of all phages display Fab on their  
17 surface in the monovalent setup, a range similar to that of other monovalent phage display libraries  
18 (Rothe et al., 2008). As expected, polyvalent Fab-phages generated in absence of wildtype pIII exhibited a  
19 much higher Fab display rate. However, even in polyvalent display, only roughly 80% of the SpyCatcher-  
20 pIII was coupled to a full length Fab, whereas the remaining SpyCatcher-pIII was coupled to what we  
21 presume to be a short degradation product of the Fab, caused by cleavage within the CH1 domain of the  
22 Fab heavy chain (Robinson et al., 2015). We further evaluated the phages by ELISA with anti-pVIII-HRP as  
23 detection reagent. By coating cognate and irrelevant antigens, we confirmed that the displayed Fabs were  
24 functional and specific (Fig. 3B). To test the elution of SpyDisplay phages by proteolysis, phages bound to  
25 immobilized antigen were incubated with TEV protease or control buffer for 30 minutes, and residual  
26 bound phages after washing were quantified by ELISA, confirming the effectiveness of our elution protocol  
27 (Fig. 3C, Suppl. Fig. S1).

28

### 29 **SpyTag/SpyCatcher-based Fab-phage assembly occurs intracellularly**

30 For coupling of phenotype to genotype, it is essential that the ligation of SpyCatcher-pIII to the SpyTagged  
31 Fab takes place inside the bacterial cell. If phage particles presenting free SpyCatcher-pIII were secreted

1 into the supernatant, ligation with Fabs released from other clones in the Fab-phage production culture  
2 could occur. This would lead to phages presenting antibodies different from the ones encoded by their  
3 phagemid. These scenarios can be tested by spiking experiments, in which SK25 bacteria expressing an  
4 antibody *A* are mixed in large excess with bacteria expressing an antibody *B*, and Fab-phages are produced  
5 in the mixed culture. For example, at 100:1 mixing ratio of *A* and *B*, and assuming equal Fab and phage  
6 production rates, the ratio of phagemids encoding antibodies *A* and *B* in the phage population is expected  
7 to be  $A:B = 100:1$ , and the ratio of free antibody released to the medium during phage production would  
8 also be  $A:B = 100:1$ .

9 If coupling occurred exclusively intracellularly, 100% of the phages displaying antibody *B* would carry the  
10 correct genotype *B*. On the other end of the spectrum, if coupling occurred exclusively in the medium,  
11 one would expect the following distribution: 98.01% of phages displaying *A* and encoding *A* (*A-A*), 0.99%  
12 displaying *B* and encoding *A* (*B-A*), 0.99% displaying *A* and encoding *B* (*A-B*), 0.01% displaying *B* and  
13 encoding *B* (*B-B*). Therefore, 99% of phages displaying antibody *B* (*B-A* and *B-B*) would carry the wrong  
14 genotype *A* (0.99% : 0.01% of total phages). Identifying the genotype of phages displaying the  
15 underrepresented antibody *B* is thus a sensitive method to assess the degree of extracellular coupling of  
16 Fab to phage.

17 We therefore mixed exponentially growing cultures of SK25 cells expressing Fabs of therapeutic  
18 antibodies adalimumab and trastuzumab in ratios of either 100:1 or 1:100 immediately before  
19 superinfection with VCSM13 helper phage. Fab-phages were produced overnight and used for one round  
20 of panning on the cognate antigen of the underrepresented antibody. As control for unspecific binding,  
21 pure adalimumab and trastuzumab Fab-phages were produced separately, quenched with SpyTag3  
22 peptide to saturate potentially free SpyCatcher sites, and also mixed in volume ratios of 100:1 and 1:100.  
23 Phages eluted after the panning round were rescued in SK25 cells and plated. 95 clones were picked from  
24 each condition and sequenced. Selection of trastuzumab phages on ErbB2 yielded 100% correct clones  
25 (95/95) while selection of adalimumab-phages on TNF $\alpha$  resulted in 96% correct clones (91/95). In the  
26 corresponding controls, 99% and 100% correct clones were found, respectively (94/95; 95/95).

27 The results of both variations of the experiment are in strong agreement with a vast preponderance of  
28 intracellular ligation of Fabs to SpyCatcher-pIII. The small number of incorrect genotypes found is similar  
29 to the control and is therefore most likely due to unspecific phage binding not unusual in phage display  
30 (Miersch et al., 2015).

## 1 **SpyDisplay enables N-terminal display and display mediated via the TAT pathway**

2 To display a protein N-terminally on phages, i.e. with a free and unmodified C-terminus, it should be  
3 sufficient to attach the SpyTag to the N-terminus of the displayed protein, as SpyTag-SpyCatcher ligation  
4 is agnostic towards the position of the tag (Zhang et al., 2013). To test the efficiency of N-terminal  
5 SpyDisplay, we added SpyTag to the N-terminus of maltose binding protein (MBP) and of a well  
6 characterized anti-fluorescein single chain (scFv) antibody (Honegger et al., 2005). Western blotting of  
7 phages produced with Hyperphage showed good display rates, with about 95% of all pIII proteins carrying  
8 the displayed protein (Fig 4A, left). Furthermore, we confirmed correct folding of the scFv antibody by  
9 testing its capacity to bind its antigen via ELISA (Fig. 4A, right). These data confirm that N-terminal display  
10 with SpyDisplay is possible and indeed well-working.

11 Another benefit of SpyDisplay could be the possibility to display proteins that fold in the cytoplasm. In  
12 addition to the Sec-dependent protein translocation pathways, where the proteins fold in the periplasm,  
13 bacteria possess the twin-arginine translocase (TAT) pathway (Palmer and Berks, 2012). In this pathway,  
14 proteins fold in the cytoplasm and are transported in folded state across the plasma membrane into the  
15 periplasm. However, using the TAT pathway to display proteins fused to full-length pIII has been  
16 challenging in the past, as periplasmic export of full-length pIII is incompatible with this translocation  
17 pathway, possibly due to multiple internal disulfide bonds (Speck et al., 2011). We expressed two proteins  
18 with a TAT pathway signal sequence, monomeric GFP (mGFP) and an antibody that can fold both in the  
19 cytoplasm or periplasm (scFv13.R4) against  $\beta$ -galactosidase (Fisher et al., 2008). GFP has been shown to  
20 only efficiently mature its fluorophore when expressed in the cytoplasm but not in the periplasm (Thomas  
21 et al., 2001). Indeed, when mGFP-SpyTag equipped with a TorA TAT signal sequence was expressed in  
22 SK25 cells superinfected with Hyperphage, strongly fluorescent phages were produced, whereas, at the  
23 same phage particle concentration, control PhoA-mGFP-SpyTag (Sec pathway) phages showed only weak  
24 fluorescence (Fig. 4B, right), demonstrating the efficacy of TAT pathway-driven SpyDisplay. When  
25 analogously expressed in SK25 superinfected with Hyperphage, intracellularly folding TorA-scFv13.R4-  
26 SpyTag showed similar activity in ELISA as periplasmatically folding PhoA-scFv13.R4-SpyTag (Fig. 4C).  
27 Western blot analysis (Figs 4B, 4C) revealed relatively modest display rates via the TAT pathway (about  
28 10% for mGFP and 30% for the scFv in relation to total pIII). This is probably caused by the TAT pathway  
29 not exporting sufficient protein into the periplasm to fully occupy all SpyCatcher sites on the polyvalent  
30 phages. The apparent free SpyCatcher sites in the case of PhoA-mGFP display are in fact coupled to a small  
31 peptide containing FLAG and SpyTag, caused by degradation of mGFP in the periplasm. This degradation



1 does not occur when mGFP is displayed using the TAT pathway (Suppl. Fig. S2 and slight band shift in Fig.  
2 4B). The presence of excess free SpyCatcher with TAT-based display suggests that the TAT pathway may  
3 have lower efficiency than Sec-based export, at least during phage production. Therefore, monovalent  
4 display might be best suited for TAT-based display.

### 5 **Selection of antibodies from a SpyDisplay Fab-phage library**

6 To test the efficiency of SpyDisplay for selecting high-affinity antibodies, we used a subset of our in-house  
7 constructed human Fab library termed Pioneer. The antibodies in this library were of the germlines IGHV1-  
8 69 and IGLV3-1, with all 6 complementarity determining regions (CDRs) diversified. This Fab library was  
9 cloned in the pBBx2-F-Spy2-H expression vector and was transformed into SK25 cells, yielding  $1.3 \times 10^{11}$   
10 transformants. Monovalent Fab-phages were produced by infection of library transformants with  
11 VCSM13.

12 We performed SpyDisplay pannings against mGFP and against the paratope of the therapeutic antibody  
13 sarilumab to generate anti-idiotypic antibodies. Monovalent display was used for all panning rounds with  
14 the aim of selecting high-affinity antibodies. Both antigens were immobilized on MaxiSorp plates in two  
15 different ways, by passive adsorption and by using biotinylated antigens on preimmobilized  
16 streptavidin/neutravidin, thus yielding 4 independent panning setups. After three rounds of panning, the  
17 panning output was transformed into *E. coli* SK13, a bacterial strain optimized for the expression of  
18 SpyTagged Fabs by removal of two proteases which cleave SpyTag2 in the periplasm (Hentrich et al.,  
19 2021).

20 To screen for antigen binding clones, 368 randomly picked single colonies from each panning (i.e. 736  
21 colonies per antigen) were grown in 384-well plates, and Fab antibodies were expressed overnight. The  
22 next day, bacteria were lysed, and antibody-containing lysates were tested by ELISA. 472 clones (64.1%)  
23 from the mGFP pannings and 550 clones (74.7%) from the sarilumab pannings showed ELISA signals of at  
24 least tenfold over background (Fig 5A). For passively adsorbed antigens, 30 clones with the highest ELISA  
25 signal were sequenced for each target. From pannings on biotinylated antigens, 95 clones with the highest  
26 ELISA signals were further screened for a low  $k_{off}$ -rate via bio-layer interferometry (BLI) (Ylera et al., 2013),  
27 and for each antigen the 20 clones with the lowest  $k_{off}$ -rate were sequenced. For mGFP, sequencing a total  
28 of 50 clones resulted in 34 unique antibodies (68%), whereas for sarilumab, 23 unique antibodies (46%)  
29 were found. Next, all unique Fabs were expressed in 50 mL cultures, purified (Knappik and Brundiers,  
30 2009), and their monovalent affinities were measured by BLI on immobilized antigen. As mGFP-coated

1 sensors could not be regenerated, anti-mGFP antibodies were first measured at a single concentration,  
2 and only for the top 20 antibodies a full kinetic measurement was performed. 98 % of all antibodies  
3 measured (20 anti-mGFP and 23 anti-sarilumab) had affinities lower than 10 nM, and 37% had affinities  
4 lower than 1 nM. The best antibodies against mGFP and sarilumab had affinities of 40 pM and 24 pM,  
5 respectively (Fig 5B, Supp. Fig S3: Sensorgrams of all antibodies found). The measured affinities  
6 demonstrate the suitability of SpyDisplay for selection of high-affinity antibodies.

## 7 **Discussion**

8 In this study, we have established SpyDisplay as a new phage display method with some important  
9 differences to traditional phage display. A key distinction between SpyDisplay and traditional antibody  
10 phage display is the separate folding of antibody and coat protein, which may be beneficial for the display  
11 of correctly folded antibodies. In practical terms, the use of the library phagemid as expression plasmid  
12 saves time by eliminating a molecular cloning step before or after screening, which is laborious, especially  
13 if many pannings are performed in parallel. Alternative methods for avoiding subcloning such as using an  
14 amber stop codon between Fab and pIII have been shown to deliver sufficient free Fab for screening and  
15 small-scale expressions. However, due to low expression yields, production of larger amounts of Fab still  
16 necessitates the use of a dedicated expression vector (Chasteen et al., 2006). Having a phagemid without  
17 pIII has a further advantage during library construction: as transformation efficiency inversely correlates  
18 with plasmid size, larger libraries can be generated by using the smaller SpyDisplay phagemid which lacks  
19 the pIII gene (1230 bp) (Hanahan, 1983). Additionally, our optimized SpyDisplay protocol allows to  
20 perform one panning round in a single day without the need for plating the output, which is especially  
21 important for high throughput antibody selections. Finally, SpyDisplay enables selection of antibodies with  
22 high affinity.

23 Monovalent and polyvalent phage display are commonly implemented by switching the type of helper  
24 phage. Monovalent display is crucial for the selection of high-affinity antibodies, whereas polyvalent  
25 display provides avidity. The efficiency of monovalent SpyDisplay for the selection of high-affinity  
26 antibodies is demonstrated by the selection of antibodies in the low pM range in our test pannings.  
27 Polyvalent SpyDisplay has been implemented by using Hyperphage and indeed showed high display rates.  
28 We envision that, in the context of Fab library panning, polyvalent SpyDisplay will facilitate the selection  
29 of antibodies against challenging targets like carbohydrates (Mazor et al., 2010). Affinities of such  
30 antibodies can later be improved by an optional affinity maturation process.

1 We have shown that the displayed antibody and the anchoring SpyCatcher-pIII protein, which are  
2 translated independently of each other, form a fusion protein exclusively in the periplasm. Optimized  
3 periplasmic secretion signal peptides for each polypeptide chain can be used. In this implementation of  
4 antibody SpyDisplay, three different signal peptides are used: OmpA and PhoA for light and heavy  
5 antibody chains, and DsbA for the SpyCatcher-pIII fusion. Furthermore, we showed that the Twin Arginine  
6 Translocation (TAT) pathway is compatible with SpyDisplay, enabling the cytoplasmic folding of the  
7 displayed proteins. The display rate via the TAT pathway could potentially be increased through  
8 optimization of the TAT signal peptide. We anticipate that TAT-based display will be useful for selecting  
9 intrabodies, antibodies that can fold in the cytoplasm, without the need for specialized intrabody libraries.

10 Mazor et al. also achieved a separation of the expression of antibody and coat protein by forming a  
11 complex between an IgG and Fc-binding ZZ-domain-pIII fusion (Mazor et al., 2010). Similarly, the Jun/Fos  
12 leucine zipper has been used to link the displayed protein to pIII (Paschke and Hohne, 2005). Since these  
13 methods are non-covalent, the complex might dissociate during stringent washing steps required for the  
14 selection of high-affinity antibodies. However, it is possible to stabilize the leucine zipper by introducing  
15 a disulfide bond between the dimerized proteins (Strauch and Georgiou, 2009). CysDisplay is another  
16 phage display method to express the antibody separately from pIII and relies on the spontaneous  
17 formation of disulfide bonds between engineered free cysteines at the C-terminus of Fab heavy chain and  
18 the N-terminus of pIII. While this method has proven powerful and became the basis of the HuCAL  
19 platform (Rothe et al., 2008), significant side reactions in this setup are the formation of pIII homodimers  
20 as well as Fab homodimers, making the control of the display rate much less straightforward compared  
21 to the specific SpyTag-SpyCatcher reaction.

22 In a previous study (Hentrich et al., 2021), we showed that efficient periplasmic expression of SpyTagged  
23 Fabs is only possible in a protease knockout strain of *E. coli*, termed SK13. However, the proteases  
24 responsible for SpyTag cleavage do not seem to harm the assembly of Fab-SpyCatcher-pIII-phages. This  
25 suggests that the ligation of SpyTagged Fab to SpyCatcher-pIII occurs sufficiently fast *in vivo* and that  
26 SpyTag is protected from cleavage by becoming part of the structured Ig-like fold of the reconstituted  
27 SpyTag-SpyCatcher fusion. This is consistent with the greatly enhanced thermal stability of SpyCatcher  
28 after coupling to SpyTag (Hentrich et al., 2021). Therefore, the SK25 (an F' strain without protease knock-  
29 outs) can be used for all SpyDisplay panning steps. For screening and purification, the selected phagemids  
30 are transformed into SK13 to express high concentrations of soluble SpyTagged Fabs. SK13 is an F- strain  
31 and thus also avoids unintended infection with contaminating phages, which could lead to the expression

1 of other antibodies in parallel. The resulting Fabs are fully compatible with SpyTag-based modular  
2 antibody assembly, enabling rapid site-specific labeling and change of oligomeric state using prefabricated  
3 SpyCatcher modules (Hentrich et al., 2021). This enables screening in mono- and bivalent format in  
4 parallel and greatly accelerates further antibody characterization, thus providing a substantial economic  
5 benefit.

6 We have established SpyDisplay here mainly for the selection of antibodies, however we do not expect  
7 any limitations regarding the displayable proteins, provided they contain a SpyTag and can be transported  
8 to the periplasm. The SpyTag of the displayed protein can be inserted at any accessible position within a  
9 protein (Zakeri et al., 2012), providing manifold options for the topology of protein display on the phage.  
10 In particular, SpyTag fused N-terminally to the displayed protein enables selection of proteins which  
11 require an unmodified C-terminus, which is not possible with the standard pIII-fusion approach.  
12 SpyTag/SpyCatcher seems furthermore well suited to display proteins in other selection systems. For  
13 example, both yeast display (Kajiwara et al., 2021) and bacterial display (Gallus et al., 2022; Gallus et al.,  
14 2020) via SpyTag/SpyCatcher have been demonstrated. The physical separation of the SpyTagged library  
15 from the other elements of the display system as shown here enables switching between display methods,  
16 provided the vector stays compatible with the host expression system. By utilizing a dual expression vector  
17 compatible with both *E. coli* and yeast expression (Patel et al., 2011), it would be possible to seamlessly  
18 switch from phage to yeast display simply by transforming the output of phage display into a SpyDisplay-  
19 compatible yeast strain displaying SpyCatcher. Similarly, a compatible plasmid would allow for a transition  
20 from phage display to mammalian display (Tesar and Hotzel, 2013). Such an approach could combine the  
21 benefits of these popular protein selection systems, namely the large library size of phage display and the  
22 ability to perform eukaryotic expression and flow cytometry sorting of the selection output in yeast or  
23 mammalian cells.

24 Other protein ligation technologies besides SpyTag/SpyCatcher have been established and could be used  
25 to establish analogous ‘covalent capture’ display methods. Such technologies include  
26 SnoopTag/SnoopCatcher (Veggiani et al., 2016), DogTag/DogCatcher (Keeble et al., 2022),  
27 SilkTag/SilkCatcher (Fan et al., 2022), split inteins (Vila-Perello and Muir, 2010), or enzyme-based ligation  
28 technologies such as ones based on sortase (Schmohl and Schwarzer, 2014), butelase (Nguyen et al.,  
29 2014), or peptiligase (Toplak et al., 2016).

30 *In vitro* selections are often hindered by biases such as the accumulation of truncated sequences or  
31 selection not based on affinity (Plessers et al., 2021). The high screening hit rates, high diversities, and

1 subnanomolar affinities of the antibodies selected by SpyDisplay suggest that SpyDisplay is resilient  
2 against such biases. This study demonstrates that SpyDisplay has the potential to significantly improve  
3 selection campaigns.

#### 4 **Materials**

##### 5 **Plasmids**

6 pBBx2-F-Spy2-H (Hentrich et al., 2021), , pKD46 (Datsenko and Wanner, 2000), pCP20 (Datsenko and  
7 Wanner, 2000), pKD13 (Datsenko and Wanner, 2000), pET28a\_SpyCatcher2 (Hentrich et al., 2021),  
8 pACYC177 (Chang and Cohen, 1978)

##### 9 **Oligonucleotides**

10 161\_SKE, 175\_SKE, 185\_SKE, 186\_SKE, 164\_SKE, 165\_SKE, 178\_SKE, 179\_SKE, 180\_SKE, 181\_SKE,  
11 182\_SKE, 183\_SKE (all this study, nucleotide sequences shown in the supplementary information)

##### 12 **Strains and phages**

13 *E. coli* TG1, *E. coli* SK25 (this study), *E. coli* SK13 (Hentrich et al., 2021)

14 VCSM13 (Agilent), Hyperphage (Progen)

##### 15 **Antibodies**

16 Anti-M13-pIII monoclonal antibody (E8033S, New England Biolabs), sheep anti-mouse IgG (H/L):HRP  
17 (AAC10P, Bio-Rad), anti-FLAG-Tag (M2) IgG-HRP (A8592, Sigma), anti-M13 bacteriophage coat protein g8p  
18 (ab9225, Abcam), goat anti-human IgG F(ab')<sub>2</sub> (STAR126, Bio-Rad), anti-M13-pVIII-HRP (Cytiva 27-9421-  
19 01, Sigma)

#### 20 **Methods**

##### 21 ***E. coli* cultivation**

22 *E. coli* strains were cultivated in 2xYT medium supplemented with glucose (Glc, varying concentrations),  
23 arabinose (Ara, varying concentrations), isopropyl β-D-1-thiogalactopyranoside (IPTG, 0.25 mM),  
24 kanamycin (Kan, 50 µg/mL), and/or chloramphenicol (Cam, 34 µg/mL). Cells were grown on orbital shakers  
25 in Erlenmeyer flasks at 250 rpm (Fab-phage production) or in 24 deep-well blocks at 400 rpm (panning) at

1 temperatures between 22°C and 37°C. For generation of SK25, plates were incubated at 42°C for plasmid  
2 curing. For selection of the F plasmid in TG1 derivatives, cells were plated on M9 agar.

### 3 **Plasmid cloning**

4 For selection and soluble expression of selected binders from SpyDisplay panning, pBBx2-F-Spy2-H  
5 (Hentrich et al., 2021) was used.

### 6 **Human antibody phage display library**

7 A subset of the Pioneer library (Bio-Rad) was used for phage display, which contained human Fab  
8 antibodies with the heavy chain germline IGHV1-69 and the light chain germline IGLV3-1. The CDR  
9 diversity was generated by gene synthesis and CDRs were cloned into the plasmid pBBx2-F-Spy2-H in  
10 successive steps.

### 11 **Generation of *E. coli* SK25**

12 The method used for generation of *E. coli* SK25 is based on the  $\lambda$ -Red-recombinase system described by  
13 Datsenko and Wanner (Datsenko and Wanner, 2000). First, the PCR-product (sequence in supplementary  
14 information) consisting of the SpyCatcher2-pIII expression cassette with the FRT-Kan-FRT cassette and  
15 *araC* was amplified with oligonucleotides 161\_SKE and 175\_SKE using the template for SK25 generation.  
16 PCR-products of correct size were gel-purified using Wizard SV Gel and PCR Clean-Up Kit (Promega). *E. coli*  
17 TG1 cells harboring the helper plasmid pKD46 were made electrocompetent (in presence of 50 mM  
18 arabinose instead of 1 mM arabinose) and transformed with the PCR product as described (Datsenko and  
19 Wanner, 2000). Mutants were identified by colony PCR using the oligos 185\_SKE and 186\_SKE. After  
20 helper plasmid curing, the KanR mutant was transformed with pCP20 for excision of the KanR cassette via  
21 Flp-FRT recombination. After curing of pCP20, correct excision of the KanR cassette was analyzed by  
22 colony PCR using primers 164\_SKE and 165\_SKE. Final verification of the correct integration of the  
23 SpyCatcher2-pIII expression cassette was performed by sequencing of the final colony PCR product with  
24 primers 164\_SKE, 165\_SKE, 178\_SKE, 179\_SKE, 180\_SKE, 181\_SKE, 182\_SKE, and 183\_SKE. Maintenance  
25 of the F plasmid was controlled after each mutagenesis step by plating on M9 agar.

### 26 **Colony PCR**

1 Fresh colonies were picked and directly resuspended in 16  $\mu$ L of the PCR mastermix. PCR was performed  
2 with hot start *Taq* DNA polymerase (New England Biolabs) according to the manufacturer's instructions.  
3 For generation of *E. coli* SK25, wildtype *E. coli* TG1 was always tested side-by-side as control.

#### 4 **Fab-phage production**

5 2xYT/1%Glc/Cam medium was inoculated from a glycerol stock of *E. coli* SK25 harboring the antibody  
6 sublibrary to an OD<sub>600</sub> of 0.1 and cultivated at 37°C and 220 rpm in 2 L shake flasks. At OD<sub>600</sub> of 0.5 to 0.8,  
7 helper phages were added (VCSM13 in monovalent SpyDisplay, Hyperphage in the polyvalent setup),  
8 followed by incubation at 37°C for 45 min without shaking and another 45 min at 220 rpm. After helper  
9 phage infection, medium was changed (2xYT/Kan/Cam/0.25 mM IPTG/0.002% arabinose) for overnight  
10 production of Fab-phages at 22°C and 220 rpm. For small scale preparations (< 2 L), phage-containing  
11 supernatants were harvested by centrifugation (6,000 x *g*, 30 min, 4°C). After filtration (0.22  $\mu$ m) phages  
12 were precipitated with ¼th volume of 20% (w/v) PEG 6000/2.5 M NaCl for 60 min on ice, followed by  
13 centrifugation (13,000 x *g*, 30 min, 4°C). The phage pellet was resuspended in PBS/20% glycerol and stored  
14 at -80°C. For large scale preparations (> 2 L), phages were filtered and concentrated using a SartoJet  
15 Membrane Pump (Sartorius) with Sartocon Slice Hydrosart cassettes (0.45  $\mu$ m for cell removal and 100  
16 kDa cutoff for phage concentration; Sartorius), followed by the final precipitation with PEG/NaCl as  
17 described above.

#### 18 **Phage ELISA**

19 96-well plates (Maxisorp F96, Thermo Fisher Scientific) were coated with anti-M13 bacteriophage coat  
20 protein g8p antibody or goat anti-human IgG F(ab')<sub>2</sub> in PBS overnight at 4°C. Plates were washed five  
21 times with TBST (TBS with 0.05% (v/v) Tween 20) after coating and blocking with 33% (v/v) ChemiBLOCKER  
22 (Merck Millipore) in TBST for 1 h at RT. Next, serial dilutions of Fab-phages in 33% (v/v)  
23 ChemiBLOCKER/TBST were transferred to the blocked plates and incubated for 1 h at RT. After washing  
24 (ten times with TBST), bound Fab-phages were detected with anti-M13-pVIII-HRP diluted 1:5,000 in 33%  
25 (v/v) ChemiBLOCKER/TBST (1 h, RT), followed by a final wash (ten times with TBST) and addition of  
26 QuantaBlu fluorogenic peroxidase substrate (Thermo Fisher Scientific). Fluorescence (excitation at 320  $\pm$   
27 25 nm, emission at 430  $\pm$  35 nm) was measured with an Infinite 200 microplate reader (Tecan). To measure  
28 the efficiency of phage elution by TEV proteolysis, serially diluted phages were bound on cognate antigens,  
29 followed by incubation with TEV Buffer (1  $\mu$ g/mL TEV protease in 50 mM Tris pH 8.0, 0.5 mM EDTA, 1 mM  
30 DTT, 0.5% (w/v) BSA) or control buffer (same buffer but without TEV protease). After washing, an ELISA

1 with anti-pVIII-HRP was performed to quantify the remaining bound phages after elution. The linear  
2 regions of the digest and corresponding control curves were fitted with a linear equation with shared Y-  
3 axis intercept (Suppl Fig S1). To determine the efficiency of cleavage, the slope of the TEV digestion  
4 condition was divided by the slope of the corresponding control and fit errors were propagated.

## 5 **Immunoblotting**

6 Western blots were performed as described (Hentrich et al., 2021). Briefly, different dilutions of phage  
7 preparations were run on SDS-PAGE and afterwards blotted onto PVDF membranes via semi-dry transfer.  
8 For detection of pIII and derivatives, blots were incubated with anti-M13-pIII monoclonal antibody,  
9 followed by washing and incubation with sheep anti-mouse IgG (H/L):HRP. Alternatively, anti-FLAG-Tag  
10 (M2) IgG-HRP was used for detection of FLAG-tagged proteins. Clarity ECL substrate (Bio-Rad) was used  
11 as HRP substrate and a Chemidoc MP imager (Bio-Rad) was used for signal detection.

## 12 **Spot titration**

13 Titer of phage preparations was determined by spot titration. (Fab)-phage preparations were serially ten-  
14 fold diluted in 2xYT-medium in a 96-well microtiter plate (ThermoFisher Scientific) in triplicates. Equal  
15 amounts of freshly grown *E. coli* SK25 with an OD<sub>600</sub> of 0.5 to 0.8 were added and the mixture was  
16 incubated for 30 min at 37°C. Afterwards, 5 µL of each dilution was spotted on LB/Cam/Glc agar plates.  
17 Titers (colony-forming units (cfu)/mL) were determined after overnight incubation at 37°C.

## 18 **Antibody selection with SpyDisplay**

19 Antigens or streptavidin/neutravidin were immobilized overnight on polystyrene plates (MaxiSorp,  
20 Thermo Fisher Scientific). Plate blocking was performed with 5% (w/v) milk powder or 5% (w/v) BSA in  
21 PBST (PBS with 0.05% (v/v) Tween 20) for 1 hour at RT, followed by incubation with biotinylated antigen  
22 where applicable. Blocked Fab-phages were transferred onto the antigen-coated plates and incubated for  
23 3 hours (1st round) or 2 hours (2nd and 3rd round) at RT at 400 rpm. After washing (5 times with TBST),  
24 selected Fab-phages were eluted with TEV-buffer (1 µg/mL TEV in 50 mM Tris pH 8.0, 0.5 mM EDTA, 1  
25 mM DTT, 0.5% (w/v) BSA) for 30 min at RT and transferred to 3.5 mL *E. coli* SK25 cells (OD<sub>600</sub> = 0.6 – 0.8)  
26 in 24-deep-well blocks. To allow phage infection of bacteria, the cultures were incubated at 37°C, 400 rpm  
27 for 1 h. Afterwards, chloramphenicol was added to a final concentration of 34 µg/mL, followed by further  
28 incubation at 37°C and 400 rpm for 30 min. VCSM13 was added to a final concentration of 10<sup>9</sup> cfu/mL,  
29 followed by incubation at 37°C and 400 rpm for 60 min. Following infection, cells were centrifuged at



1 2,200 x g at RT for 5 min and resuspended in a larger volume (25 mL Fab-phage expression medium:  
2 2xYT/Cam/Kan/0.25 mM IPTG/0.005% Ara) to ensure the efficacy of the antibiotics (Supp. Fig. S4). Fab-  
3 phages were expressed overnight at 30°C and 350 rpm in an orbital shaker (Multitron, Infors HT). The next  
4 panning round was performed with Fab-phage-containing supernatants of the overnight cultures. After  
5 three rounds of panning, the plasmids of the panning output were isolated via DNA preparation (PureYield  
6 Plasmid Miniprep System, Promega) and transformed into chemically competent *E. coli* SK13 (Hentrich et  
7 al., 2021) cells.

### 8 **Identification of antigen-binding clones via primary screening ELISA**

9 Identification of antigen binding clones was performed as described previously (Jarutat et al., 2006).  
10 Briefly, 368 single clones were picked, Fab-fragments were expressed overnight in 384-well microtiter  
11 plate (ThermoFisher Scientific), and crude bacterial lysates were used for ELISA screening. 384-well plates  
12 (MaxiSorp black, ThermoFisher Scientific) were coated with antigens and controls overnight in PBS at 4°C.  
13 Plates were washed five times with PBST after coating and blocking with 5% milk-PBST or 5% BSA-PBST  
14 for 1 h at RT. Next, blocked lysates (diluted 1:2 in PBST) were transferred onto the antigen coated plates  
15 and incubated for 1 h at RT. After washing (ten times with PBST), bound Fab-fragments were detected  
16 with anti-FLAG-tag (M2) IgG-HRP diluted 1:20,000 in 0.5% milk-PBST (1 h, RT), followed by washing (ten  
17 times with PBST) and addition of QuantaBlu Fluorogenic Peroxidase Substrate (Thermo Fisher Scientific).  
18 Fluorescence (excitation at  $320 \pm 25$  nm, emission at  $430 \pm 35$  nm) was measured with an Infinite 200  
19 microplate reader (Tecan). Antibodies which showed a signal greater than ten-fold over background and  
20 did not recognize the negative control proteins were considered as antigen-binding clones. For pannings  
21 on passively adsorbed antigen, 30 clones with the highest ELISA signals were sequenced and unique clones  
22 were expressed and purified as described below. For pannings on biotinylated antigens, a  $K_{off}$  ranking was  
23 performed with 95 top hits from primary screening.

### 24 **$K_{off}$ ranking via bio-layer interferometry**

25 For clones derived from pannings on biotinylated antigens, off-rate screening was performed on Octet  
26 RED384 and Octet HTX instruments (Sartorius) as described previously (Ylera et al., 2013). Lysates of 95  
27 antibodies showing the strongest signal in primary screening ELISA were tested. Biotinylated antigens  
28 were immobilized on streptavidin sensors (SA, Sartorius) with typical immobilization levels of  $5 \pm 0.5$  nm  
29 and  $1.5 \pm 0.5$  nm for biotinylated mGFP (lot-specific variations) and  $5 \pm 0.5$  nm for biotinylated sarilumab.  
30 Baseline was measured in mock lysates without target-specific antibodies for 5 min, followed by the

1 association phase (7.5 min) in specific lysates. Dissociation rate was again measured in mock lysates (7.5  
2 min). Data were analyzed using a 1:1 interaction model with Octet Analysis Studio software 12.2. Curves  
3 with poor fits ( $R^2 < 0.96$ ) were excluded from analysis.

#### 4 **Protein expression and purification**

5 Fab fragments were expressed and purified as described previously (Knappik and Brundiers, 2009). In  
6 short, 2xYT/0.1%Glc/Cam medium was inoculated from an overnight culture with *E. coli* SK13 containing  
7 the expression plasmids and cultivated at 30°C and 250 rpm until the OD<sub>600</sub> reached about 0.5, followed  
8 by induction with 0.8 mM IPTG and overnight incubation at 27.5°C. Bacterial pellets were lysed with  
9 BugBuster (Merck KGaA), supplemented with 20 units/mL Benzonase (Merck KGaA), 2 mg/mL lysozyme  
10 (Merck KGaA) and protease inhibitors (Complete EDTA free; Roche) and loaded on Ni-NTA agarose  
11 (Qiagen). After washing, Fab fragments were eluted with imidazole-containing buffer (250 mM imidazole,  
12 500 mM NaCl, 20 mM NaH<sub>2</sub>PO<sub>4</sub> pH 7.4), followed by buffer exchange to PBS via PD10 columns (GE  
13 Healthcare). TEV protease was expressed and purified as described (Tropea et al., 2009).

#### 14 **Affinity determination**

15 Affinities of purified Fab fragments were determined on Octet RED384 and Octet HTX instruments  
16 (Sartorius) as described previously (Ylera et al., 2013). Briefly, biotinylated antigens were immobilized on  
17 streptavidin sensors (SA, Sartorius). Kinetic parameters were determined with purified Fab fragments at  
18 five concentrations ranging from 200 nM to 0.13 nM in running buffer (PBS, 0.1% (w/v) BSA, 0.02% (v/v)  
19 Tween 20). The association was measured for 600 s and the dissociation for 300 to 1,800 s, depending on  
20 the binding strength. For sarilumab, before each single cycle of the measurement, biosensor surface was  
21 regenerated with 10 mM glycine, pH 3.0. In case of mGFP, each Fab dilution was measured on a separate  
22 sensor without regeneration. Data were analyzed using a 1:1 interaction model with Octet Analysis Studio  
23 software 12.2.

24

1 **Figure Legends**

2 **Figure 1: SpyTag/SpyCatcher and the concept of SpyDisplay**

3 **A:** SpyCatcher (violet) and SpyTag (green) react spontaneously to form an isopeptide bond (red).  
4 Structures from PDB 4MLI (Li et al., 2014).

5 **B:** In SpyDisplay of antibodies, SpyCatcher-pIII reacts with SpyTagged Fab antibody fragments in the  
6 periplasm before (or concomitant with) phage assembly, resulting in phages displaying antibodies (shown  
7 here for monovalent display).

8

9 **Figure 2: Creation of SpyCatcher-pIII expressing *E. coli* strain SK25**

10 **A:** Phage  $\lambda$  Red recombinase A was used to replace the *araBAD* genes of TG1 *E. coli* with a cassette  
11 consisting of a kanamycin resistance gene, *araC*, and SpyCatcher-pIII under control of the pBAD promoter.  
12 In the second step, the kanamycin resistance cassette was excised via FLP recombinase.

13 **B:** Expression of SpyCatcher-pIII in SK25 bacteria analyzed by immunoblotting. SK25 cells were grown  
14 overnight at 22°C in presence of varying concentrations of arabinose and equal numbers of bacteria were  
15 lysed. Lysates were probed with anti-M13-pIII followed by sheep anti-mouse IgG (H/L):HRP. For  
16 SpyCatcher-pIII, the apparent molecular weight by SDS PAGE of 75 kDa is higher than the calculated  
17 molecular weight of 57 kDa.

18 **C:** Immunoblot of phages produced by infecting SK25 bacteria with Hyperphage. PEG-precipitated phages  
19 were separated electrophoretically, immunoblotted, and detection was performed as described in B.

20

21 **Figure 3: Production of Fab-phages**

22 **A:** Immunoblots of SpyDisplay phages displaying Fabs of adalimumab (A) or trastuzumab (T) and produced  
23 with VCSM13 or Hyperphage as helper phage. Detection was performed with anti-M13-pIII followed by  
24 sheep anti-mouse IgG (H/L):HRP or anti-FLAG-HRP. Bands corresponding to the heavy chain fusion,  
25 degraded heavy chain fusion, and wildtype pIII are marked.

26 **B:** ELISA with polyvalent Fab-phages on cognate and irrelevant antigens, detection with anti-pVIII-HRP.

1 **C:** Fractions of monovalent Fab-phages eluted from MaxiSorp plates after treatment with TEV Protease  
2 for 30 minutes, relative to buffer control.

3

#### 4 **Figure 4: Versatility of display setups with SpyDisplay**

5 **A:** Left: Immunoblot analysis of polyvalent SpyDisplay phages displaying the E2 scFv or MBP with an N-  
6 terminal SpyTag. Detection was performed with anti-M13-pIII followed by sheep anti-mouse IgG  
7 (H/L):HRP. Right: ELISA of polyvalent phages displaying N-terminally SpyTagged E2 scFv on control (BSA)  
8 or cognate antigen (BSA-FITC), in comparison to control phages (displaying N-terminally SpyTagged MBP).

9 **B:** Left: Immunoblot analysis of polyvalent SpyDisplay phages displaying mGFP-SpyTag with a PhoA or TorA  
10 leader peptide. Detection performed with anti-M13-pIII followed by sheep anti-mouse IgG (H/L):HRP.  
11 Right: Fluorescence image of GFP-phages and control phages at equal concentrations ( $5 \times 10^{11}$  cfu/mL) in  
12 microcentrifuge tubes.

13 **C:** Left: Immunoblot analysis of polyvalent SpyDisplay phages displaying scFv13.R4-SpyTag with a PhoA or  
14 TorA leader peptide. Detection performed with anti-M13-pIII followed by sheep anti-mouse IgG  
15 (H/L):HRP. Right: ELISA of polyvalent phages displaying scFv13.R4 with on control (BSA) or cognate antigen  
16 ( $\beta$ -galactosidase), in comparison to control phages.

17

#### 18 **Figure 5: SpyDisplay selections of antibodies from Fab library**

19 **A:** Number of positive hits (>10-fold over background in ELISA on cognate antigen) from screening Fabs  
20 generated against mGFP or the paratope of sarilumab (out of 736 tested antibodies per antigen).

21 **B:** Left: Distribution of  $K_D$  values of sequenced and purified antibodies against mGFP and sarilumab. Right:  
22 BLI sensorgrams of the best antibodies against each antigen.

23

24

25

26

1 **Acknowledgements:**

2 We thank our colleagues in the Fab production and assay teams for antibody purification and quality  
3 control and our colleagues in lab support for production of the library phages. We thank Melissa Wich  
4 for critical reading of the manuscript.

5 **Competing interest statement:**

6 All authors are employees of Bio-Rad AbD Serotec GmbH. Bio-Rad Laboratories, Inc. filed patent  
7 applications on technologies described herein, on which F.Y. is listed as inventor.

8 **Contributions:**

9 S.-J.K., H.H., M.C., C.H., and M.P. performed experiments. S.-J.K., C.H., M.P., and F.Y. designed  
10 experiments and analyzed the data. A.K. and F.Y. conceived the project. C.H., S.-J.K., M.P., A.K., and F.Y.  
11 wrote the manuscript.

## 1   **References**

- 2
- 3   Alam, M.K., Gonzalez, C., Hill, W., El-Sayed, A., Fonge, H., Barreto, K., and Geyer, C.R. (2017). Synthetic  
4   Modular Antibody Construction by Using the SpyTag/SpyCatcher Protein-Ligase System. *Chembiochem*  
5   *18*, 2217-2221.
- 6   Breitling, F., Dubel, S., Seehaus, T., Klewinghaus, I., and Little, M. (1991). A surface expression vector for  
7   antibody screening. *Gene* *104*, 147-153.
- 8   Chang, A.C., and Cohen, S.N. (1978). Construction and characterization of amplifiable multicopy DNA  
9   cloning vehicles derived from the P15A cryptic miniplasmid. *J Bacteriol* *134*, 1141-1156.
- 10   Chasteen, L., Ayriss, J., Pavlik, P., and Bradbury, A.R. (2006). Eliminating helper phage from phage  
11   display. *Nucleic Acids Res* *34*, e145.
- 12   Datsenko, K.A., and Wanner, B.L. (2000). One-step inactivation of chromosomal genes in *Escherichia coli*  
13   K-12 using PCR products. *Proc Natl Acad Sci U S A* *97*, 6640-6645.
- 14   Dubel, S., Breitling, F., Fuchs, P., Braunagel, M., Klewinghaus, I., and Little, M. (1993). A family of vectors  
15   for surface display and production of antibodies. *Gene* *128*, 97-101.
- 16   Fan, R., Hakanpää, J., Elfving, K., Taberman, H., Linder, M.B., and Aranko, A.S. (2022). Engineering a  
17   minimal SilkCatcher/Tag pair compatible with SpyCatcher/Tag pair for the production of native-sized  
18   spider silk. *bioRxiv*, 2022.2010.2021.513168.
- 19   Fisher, A.C., Kim, J.Y., Perez-Rodriguez, R., Tullman-Ercek, D., Fish, W.R., Henderson, L.A., and DeLisa,  
20   M.P. (2008). Exploration of twin-arginine translocation for expression and purification of correctly folded  
21   proteins in *Escherichia coli*. *Microb Biotechnol* *1*, 403-415.
- 22   Gallus, S., Mittmann, E., and Rabe, K.S. (2022). A Modular System for the Rapid Comparison of Different  
23   Membrane Anchors for Surface Display on *Escherichia coli*. *Chembiochem* *23*, e202100472.
- 24   Gallus, S., Peschke, T., Paulsen, M., Burgahn, T., Niemeyer, C.M., and Rabe, K.S. (2020). Surface Display  
25   of Complex Enzymes by in Situ SpyCatcher-SpyTag Interaction. *Chembiochem* *21*, 2126-2131.
- 26   Guzman, L.M., Belin, D., Carson, M.J., and Beckwith, J. (1995). Tight regulation, modulation, and high-  
27   level expression by vectors containing the arabinose PBAD promoter. *J Bacteriol* *177*, 4121-4130.
- 28   Hanahan, D. (1983). Studies on transformation of *Escherichia coli* with plasmids. *J Mol Biol* *166*, 557-580.
- 29   Hentrich, C., Kellmann, S.J., Putyrski, M., Cavada, M., Hanuschka, H., Knappik, A., and Ylera, F. (2021).  
30   Periplasmic expression of SpyTagged antibody fragments enables rapid modular antibody assembly. *Cell*  
31   *Chem Biol* *28*, 813-824 e816.
- 32   Honegger, A., Spinelli, S., Cambillau, C., and Pluckthun, A. (2005). A mutation designed to alter crystal  
33   packing permits structural analysis of a tight-binding fluorescein-scFv complex. *Protein Sci* *14*, 2537-  
34   2549.
- 35   Jarutat, T., Frisch, C., Nickels, C., Merz, H., and Knappik, A. (2006). Isolation and comparative  
36   characterization of Ki-67 equivalent antibodies from the HuCAL phage display library. *Biol Chem* *387*,  
37   995-1003.
- 38   Jijakli, K., Khraiweh, B., Fu, W., Luo, L., Alzahmi, A., Koussa, J., Chaiboonchoe, A., Kirmizialtin, S., Yen, L.,  
39   and Salehi-Ashtiani, K. (2016). The in vitro selection world. *Methods* *106*, 3-13.
- 40   Kajiwara, K., Aoki, W., Koike, N., and Ueda, M. (2021). Development of a yeast cell surface display  
41   method using the SpyTag/SpyCatcher system. *Sci Rep* *11*, 11059.
- 42   Keeble, A.H., Banerjee, A., Ferla, M.P., Reddington, S.C., Anuar, I., and Howarth, M. (2017). Evolving  
43   Accelerated Amidation by SpyTag/SpyCatcher to Analyze Membrane Dynamics. *Angew Chem Int Ed Engl*  
44   *56*, 16521-16525.
- 45   Keeble, A.H., and Howarth, M. (2020). Power to the protein: enhancing and combining activities using  
46   the Spy toolbox. *Chem Sci* *11*, 7281-7291.

- 1 Keeble, A.H., Turkki, P., Stokes, S., Khairil Anuar, I.N.A., Rahikainen, R., Hytonen, V.P., and Howarth, M.  
2 (2019). Approaching infinite affinity through engineering of peptide-protein interaction. *Proc Natl Acad*  
3 *Sci U S A*.
- 4 Keeble, A.H., Yadav, V.K., Ferla, M.P., Bauer, C.C., Chuntharpursat-Bon, E., Huang, J., Bon, R.S., and  
5 Howarth, M. (2022). DogCatcher allows loop-friendly protein-protein ligation. *Cell Chem Biol* 29, 339-  
6 350 e310.
- 7 Knappik, A., and Brundiers, R. (2009). Recombinant Antibody Expression and Purification. In *The Protein*  
8 *Protocols Handbook*, J.M. Walker, ed. (Totowa, NJ: Humana Press), pp. 1929-1943.
- 9 Li, L., Fierer, J.O., Rapoport, T.A., and Howarth, M. (2014). Structural analysis and optimization of the  
10 covalent association between SpyCatcher and a peptide Tag. *J Mol Biol* 426, 309-317.
- 11 Loset, G.A., Kristinsson, S.G., and Sandlie, I. (2008). Reliable titration of filamentous bacteriophages  
12 independent of pIII fusion moiety and genome size by using trypsin to restore wild-type pIII phenotype.  
13 *Biotechniques* 44, 551-552, 554.
- 14 Mazor, Y., Van Blarcom, T., Carroll, S., and Georgiou, G. (2010). Selection of full-length IgGs by tandem  
15 display on filamentous phage particles and Escherichia coli fluorescence-activated cell sorting screening.  
16 *FEBS J* 277, 2291-2303.
- 17 Miersch, S., Li, Z., Hanna, R., McLaughlin, M.E., Hornsby, M., Matsuguchi, T., Paduch, M., Saaf, A., Wells,  
18 J., Koide, S., *et al.* (2015). Scalable high throughput selection from phage-displayed synthetic antibody  
19 libraries. *J Vis Exp*, 51492.
- 20 Nguyen, G.K., Wang, S., Qiu, Y., Hemu, X., Lian, Y., and Tam, J.P. (2014). Butelase 1 is an Asx-specific  
21 ligase enabling peptide macrocyclization and synthesis. *Nat Chem Biol* 10, 732-738.
- 22 Palmer, T., and Berks, B.C. (2012). The twin-arginine translocation (Tat) protein export pathway. *Nat Rev*  
23 *Microbiol* 10, 483-496.
- 24 Paschke, M. (2006). Phage display systems and their applications. *Appl Microbiol Biotechnol* 70, 2-11.
- 25 Paschke, M., and Hohne, W. (2005). A twin-arginine translocation (Tat)-mediated phage display system.  
26 *Gene* 350, 79-88.
- 27 Patel, C.A., Wang, J., Wang, X., Dong, F., Zhong, P., Luo, P.P., and Wang, K.C. (2011). Parallel selection of  
28 antibody libraries on phage and yeast surfaces via a cross-species display. *Protein Eng Des Sel* 24, 711-  
29 719.
- 30 Plessers, S., Van Deuren, V., Lavigne, R., and Robben, J. (2021). High-Throughput Sequencing of Phage  
31 Display Libraries Reveals Parasitic Enrichment of Indel Mutants Caused by Amplification Bias. *Int J Mol*  
32 *Sci* 22.
- 33 Qi, H., Lu, H., Qiu, H.J., Petrenko, V., and Liu, A. (2012). Phagemid vectors for phage display: properties,  
34 characteristics and construction. *J Mol Biol* 417, 129-143.
- 35 Robinson, M.P., Ke, N., Lobstein, J., Peterson, C., Szkodny, A., Mansell, T.J., Tuckey, C., Riggs, P.D.,  
36 Colussi, P.A., Noren, C.J., *et al.* (2015). Efficient expression of full-length antibodies in the cytoplasm of  
37 engineered bacteria. *Nat Commun* 6, 8072.
- 38 Rondot, S., Koch, J., Breitling, F., and Dubel, S. (2001). A helper phage to improve single-chain antibody  
39 presentation in phage display. *Nat Biotechnol* 19, 75-78.
- 40 Rothe, C., Urlinger, S., Lohning, C., Prassler, J., Stark, Y., Jager, U., Hubner, B., Bardroff, M., Pradel, I.,  
41 Boss, M., *et al.* (2008). The human combinatorial antibody library HuCAL GOLD combines diversification  
42 of all six CDRs according to the natural immune system with a novel display method for efficient  
43 selection of high-affinity antibodies. *J Mol Biol* 376, 1182-1200.
- 44 Schmohl, L., and Schwarzer, D. (2014). Sortase-mediated ligations for the site-specific modification of  
45 proteins. *Curr Opin Chem Biol* 22, 122-128.
- 46 Speck, J., Arndt, K.M., and Muller, K.M. (2011). Efficient phage display of intracellularly folded proteins  
47 mediated by the TAT pathway. *Protein Eng Des Sel* 24, 473-484.

- 1 Strauch, E.-M., and Georgiou, G. (2009). Mechanistic Challenges and Engineering Applications of Protein  
2 Export in *E. coli*. In *Systems Biology and Biotechnology of Escherichia coli*, S.Y. Lee, ed. (Dordrecht:  
3 Springer Netherlands), pp. 327-349.
- 4 Tesar, D., and Hotzel, I. (2013). A dual host vector for Fab phage display and expression of native IgG in  
5 mammalian cells. *Protein Eng Des Sel* 26, 655-662.
- 6 Thomas, J.D., Daniel, R.A., Errington, J., and Robinson, C. (2001). Export of active green fluorescent  
7 protein to the periplasm by the twin-arginine translocase (Tat) pathway in *Escherichia coli*. *Mol*  
8 *Microbiol* 39, 47-53.
- 9 Toplak, A., Nuijens, T., Quaedflieg, P.J.L.M., Wu, B., and Janssen, D.B. (2016). Peptiligase, an Enzyme for  
10 Efficient Chemoenzymatic Peptide Synthesis and Cyclization in Water. *Advanced Synthesis & Catalysis*  
11 358, 2140-2147.
- 12 Tropea, J.E., Cherry, S., and Waugh, D.S. (2009). Expression and purification of soluble His(6)-tagged TEV  
13 protease. *Methods Mol Biol* 498, 297-307.
- 14 Veggiani, G., Nakamura, T., Brenner, M.D., Gayet, R.V., Yan, J., Robinson, C.V., and Howarth, M. (2016).  
15 Programmable polyproteins built using twin peptide superglues. *Proc Natl Acad Sci U S A* 113, 1202-  
16 1207.
- 17 Vila-Perello, M., and Muir, T.W. (2010). Biological applications of protein splicing. *Cell* 143, 191-200.
- 18 Ward, R.L., Clark, M.A., Lees, J., and Hawkins, N.J. (1996). Retrieval of human antibodies from phage-  
19 display libraries using enzymatic cleavage. *J Immunol Methods* 189, 73-82.
- 20 Winter, G., Griffiths, A.D., Hawkins, R.E., and Hoogenboom, H.R. (1994). Making antibodies by phage  
21 display technology. *Annu Rev Immunol* 12, 433-455.
- 22 Ylera, F., Harth, S., Waldherr, D., Frisch, C., and Knappik, A. (2013). Off-rate screening for selection of  
23 high-affinity anti-drug antibodies. *Anal Biochem* 441, 208-213.
- 24 Zakeri, B., Fierer, J.O., Celik, E., Chittock, E.C., Schwarz-Linek, U., Moy, V.T., and Howarth, M. (2012).  
25 Peptide tag forming a rapid covalent bond to a protein, through engineering a bacterial adhesin. *Proc*  
26 *Natl Acad Sci U S A* 109, E690-697.
- 27 Zhang, W.B., Sun, F., Tirrell, D.A., and Arnold, F.H. (2013). Controlling macromolecular topology with  
28 genetically encoded SpyTag-SpyCatcher chemistry. *J Am Chem Soc* 135, 13988-13997.

29

30



**A**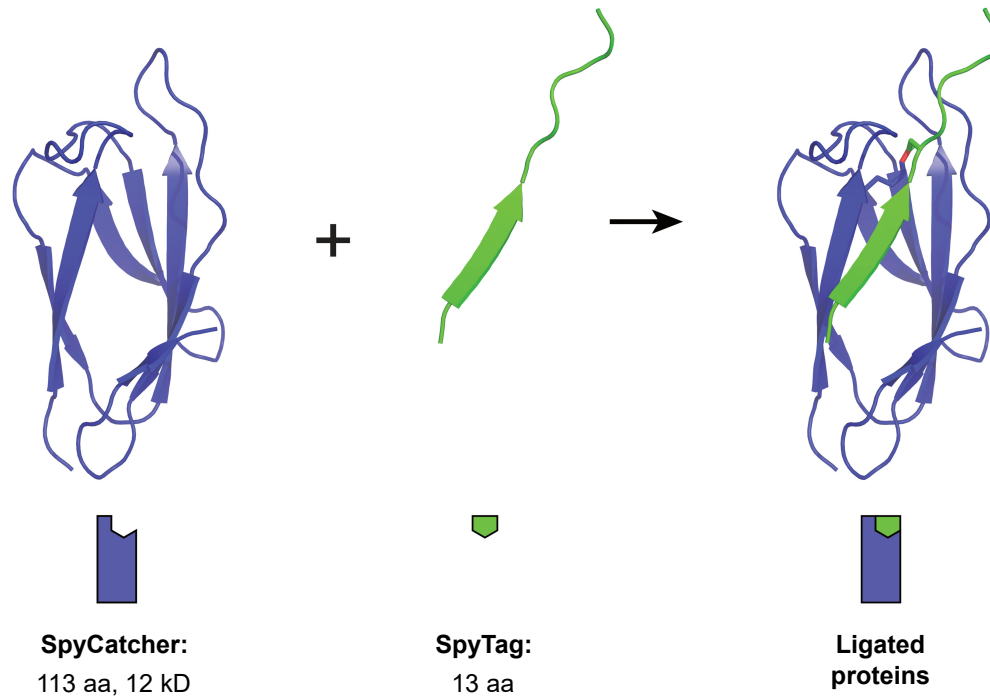**B**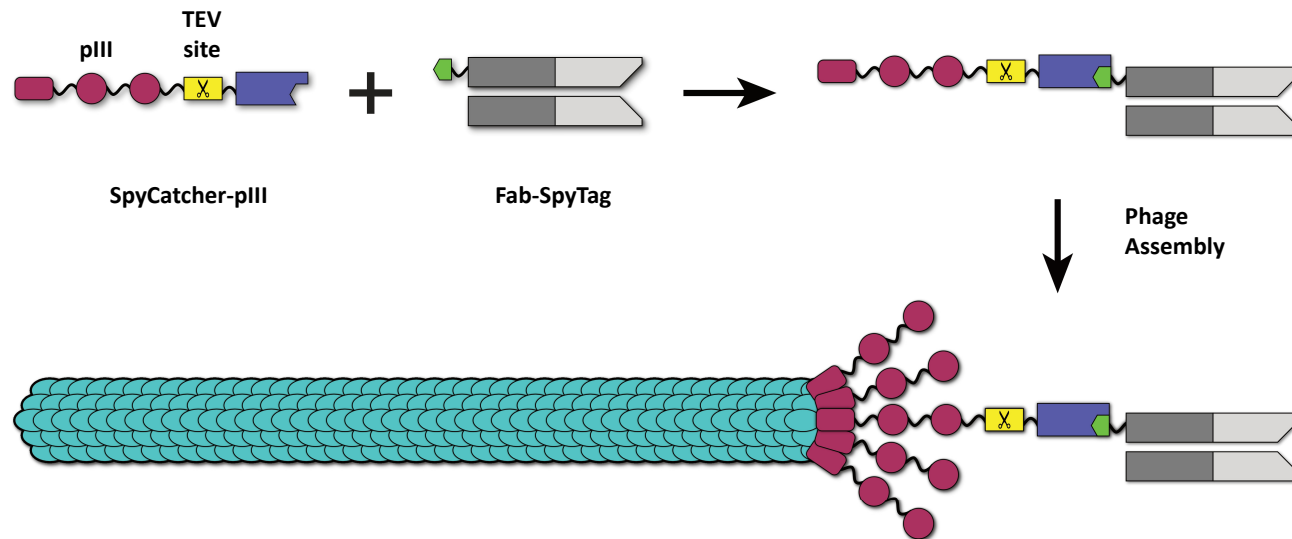**Figure 1**

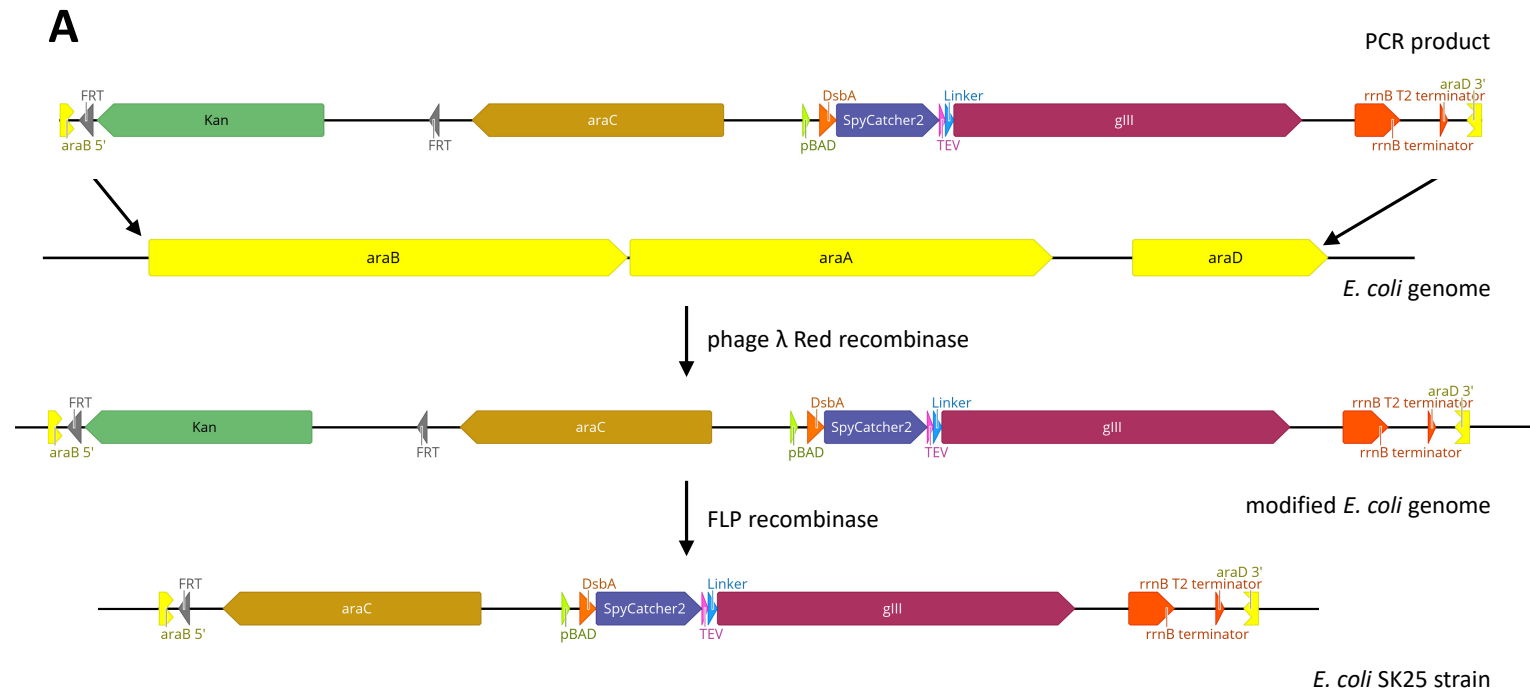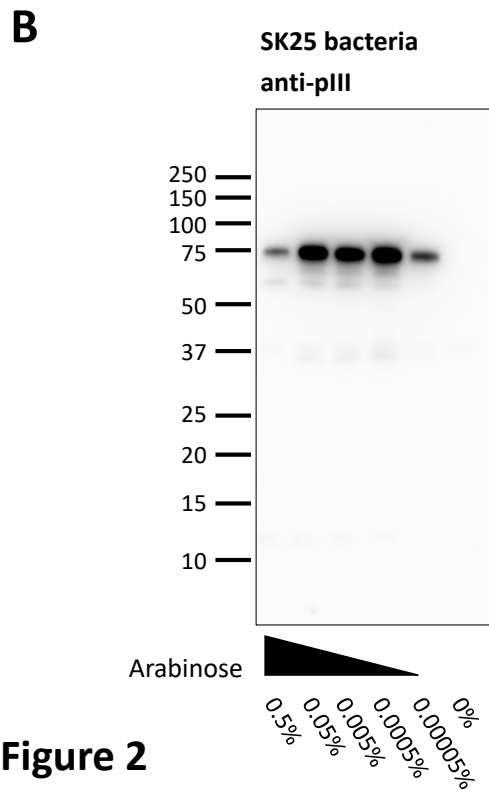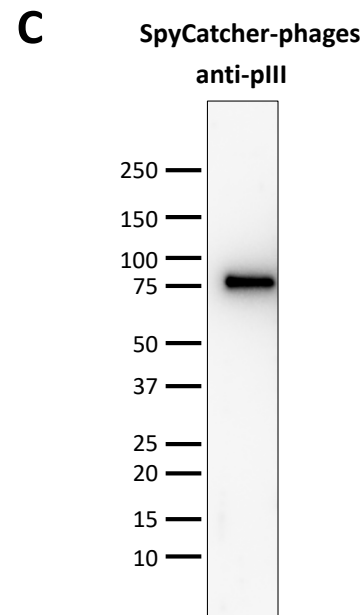

**Figure 2**

**A**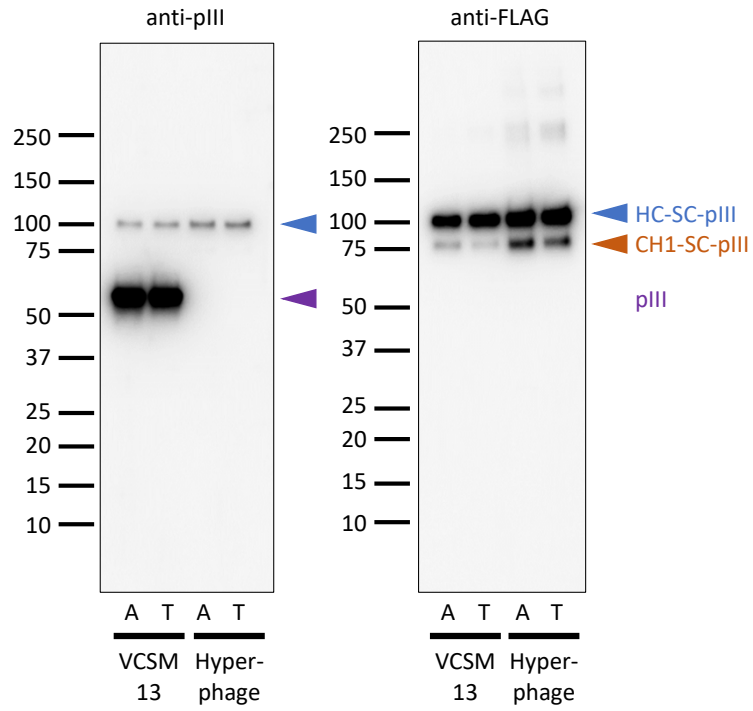**B**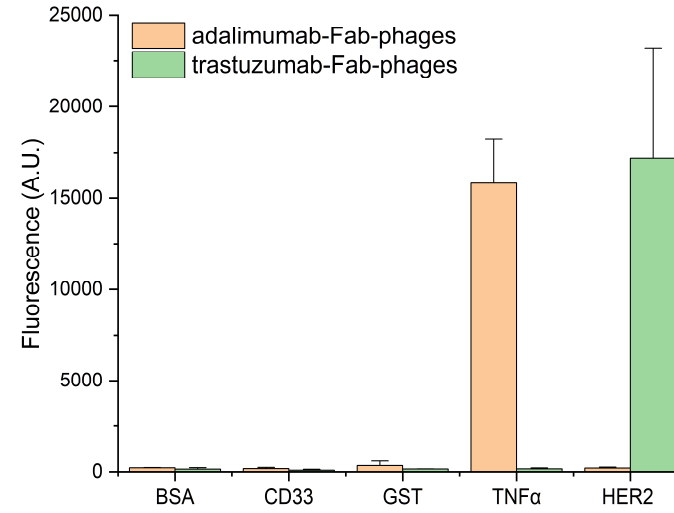**C**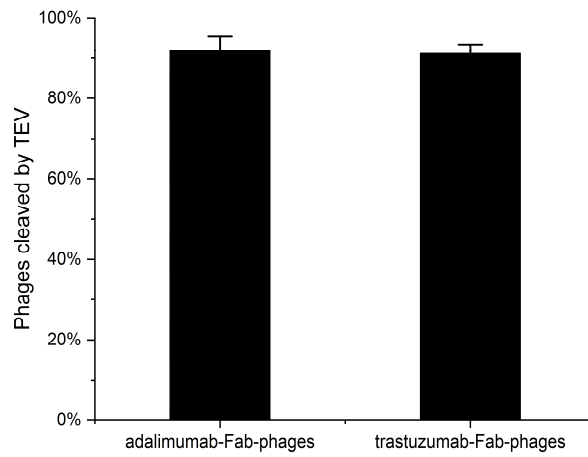**Figure 3**

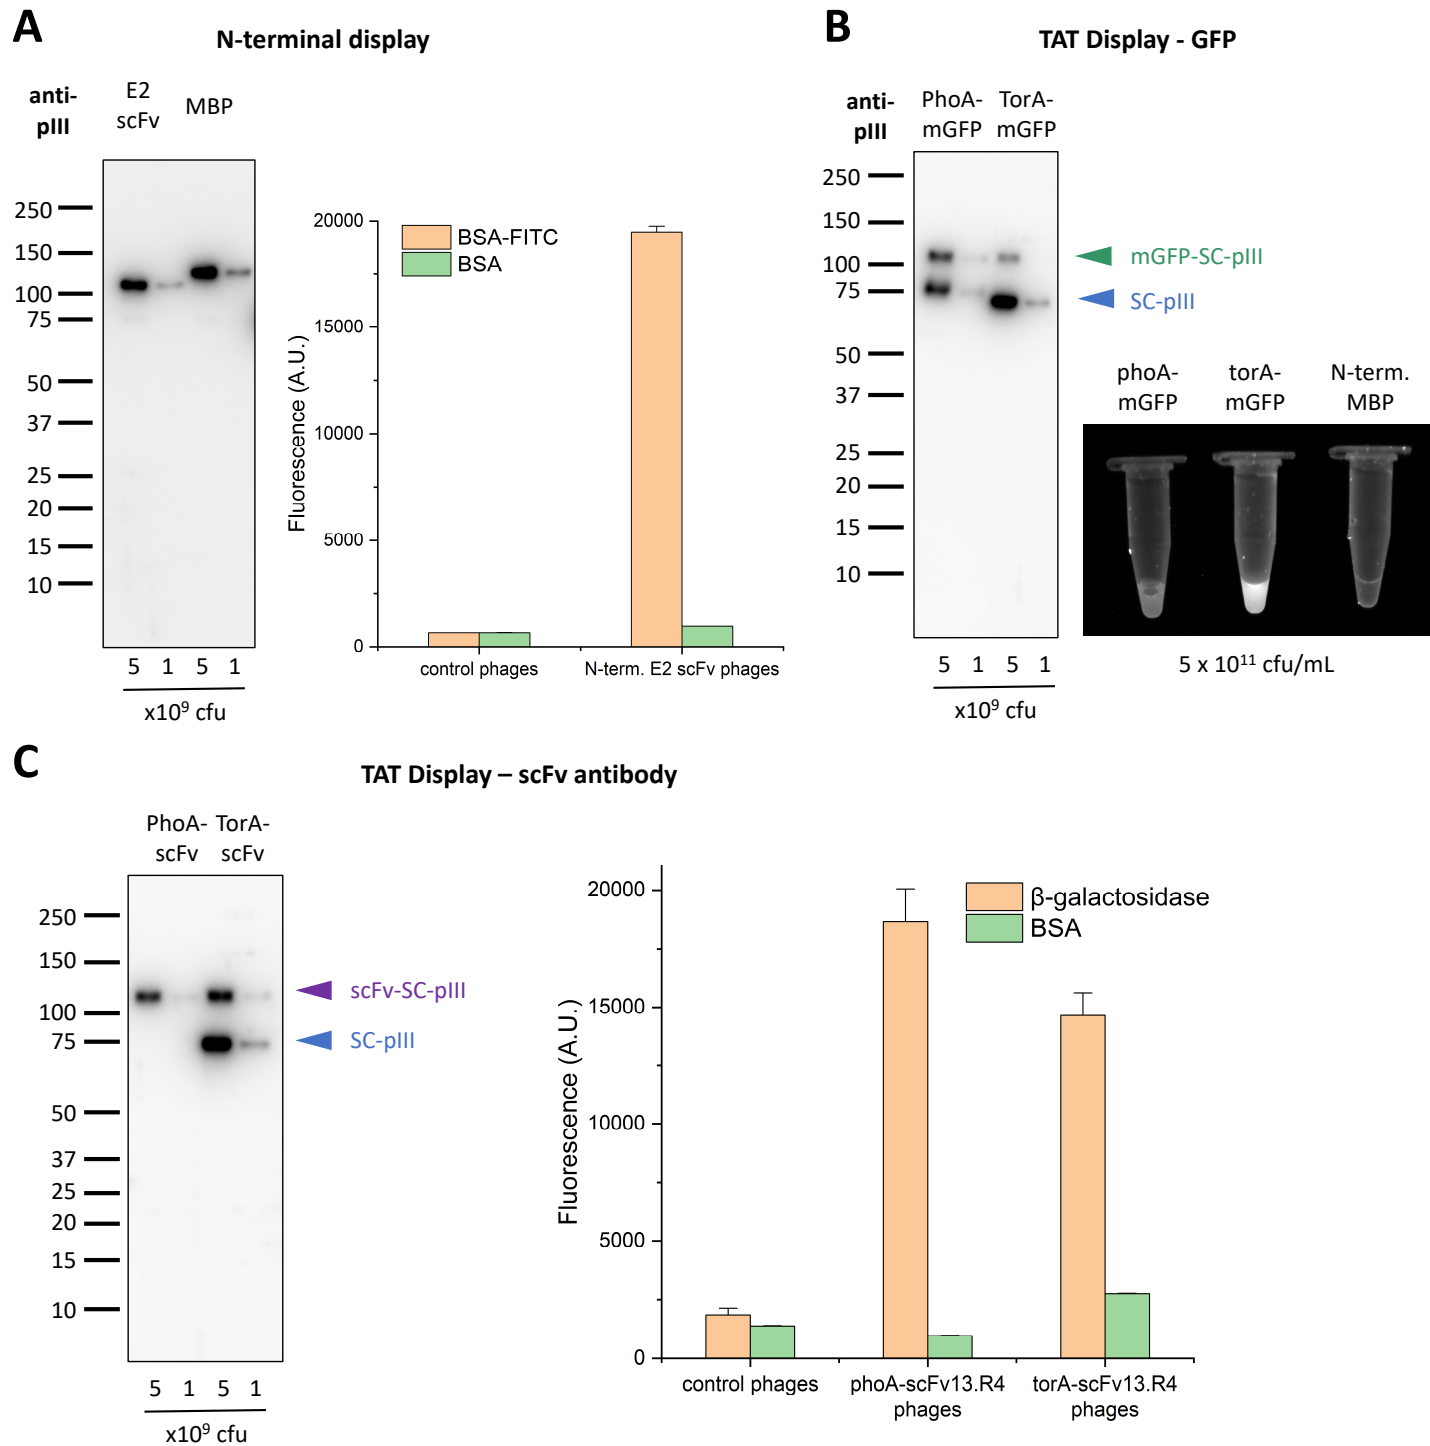

**Figure 4**

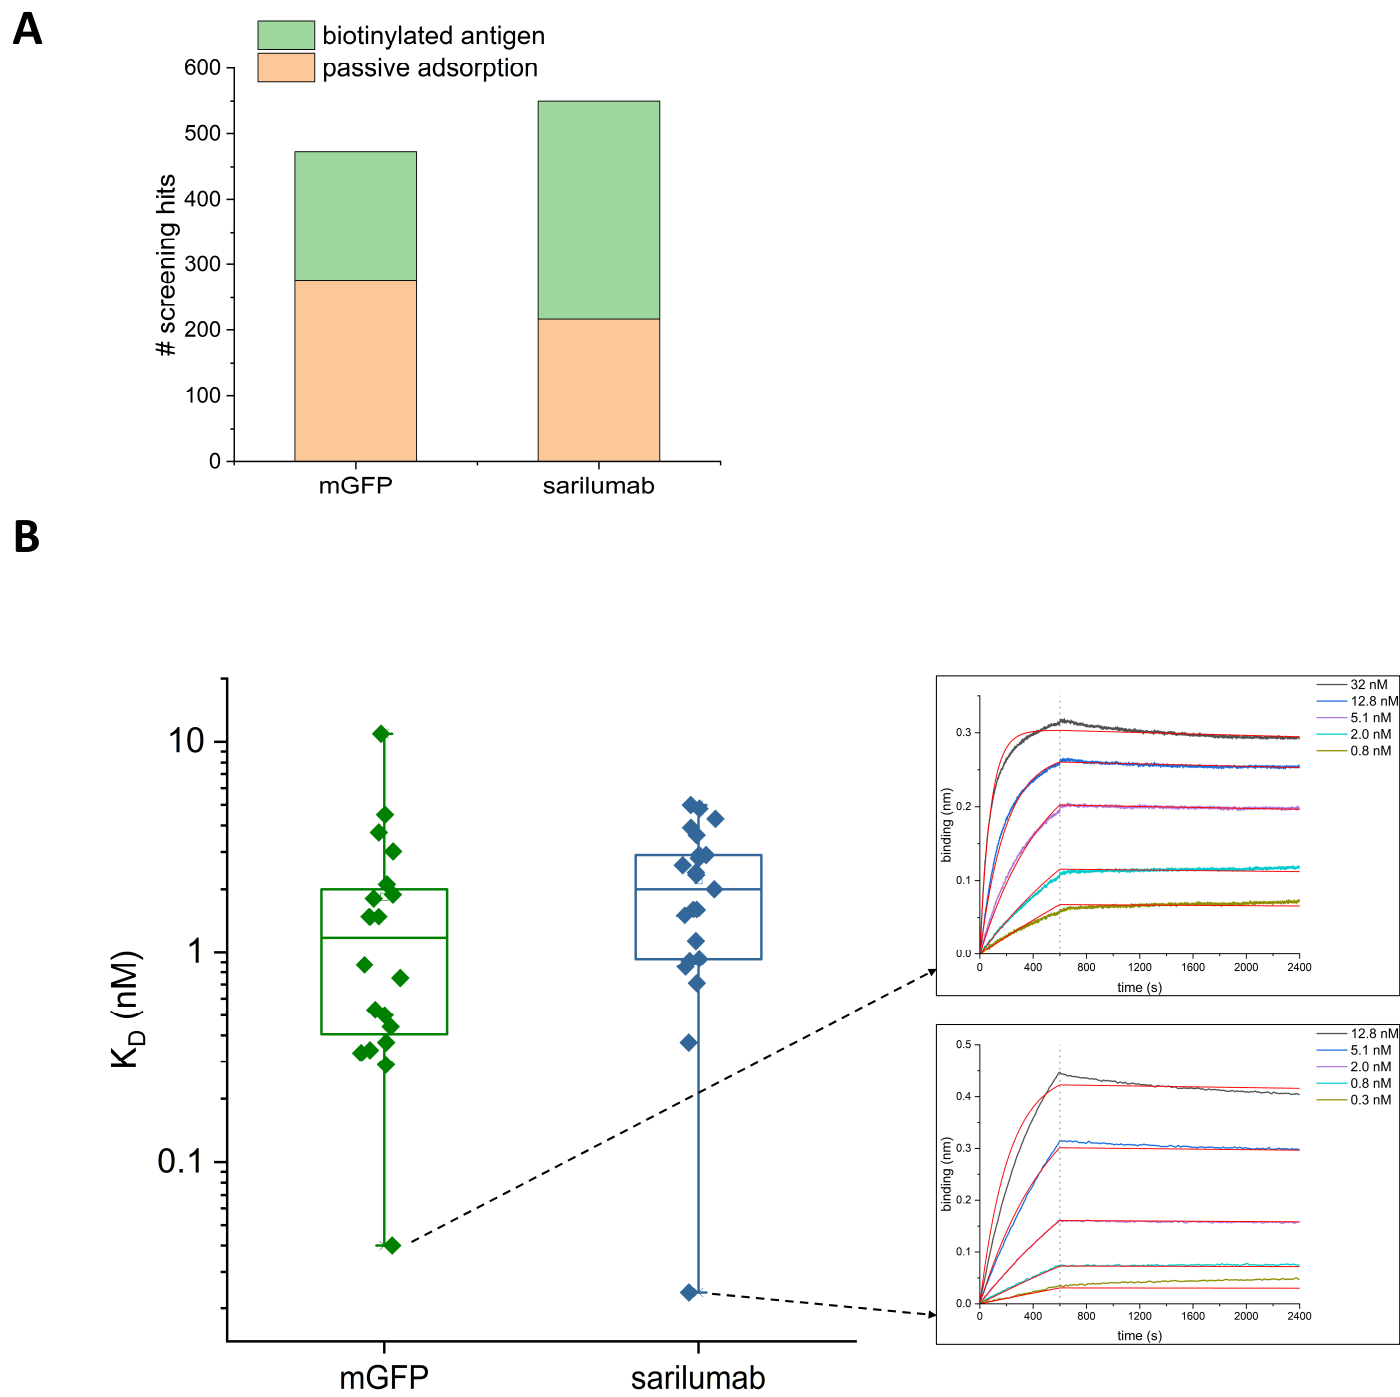

Figure 5
